# Supplementary material for: NT157 Inhibits Hepatocellular Carcinoma Growth and Sensitizes Cells to Sorafenib
Source: Research Square preprint supplement (doi:10.21203/rs.3.rs-216140/v1), 2021-02-22
Supplement: Supplementary file 1 [file f82dabcc3d6001df121779da.docx]

**
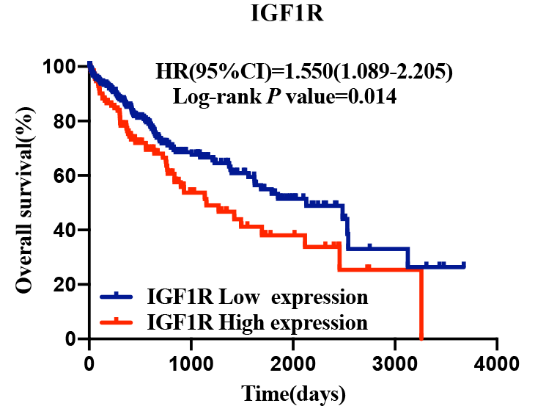
**

**Supplementary Fig.1** Kaplan-Meier plot showed low IGF-1R expression correlated with a longer overall survival in another independent cohort. HR: Hazard ratio.
